# Supplementary material
Source: PubMed Central journal article supplement (PMC1312388)

A

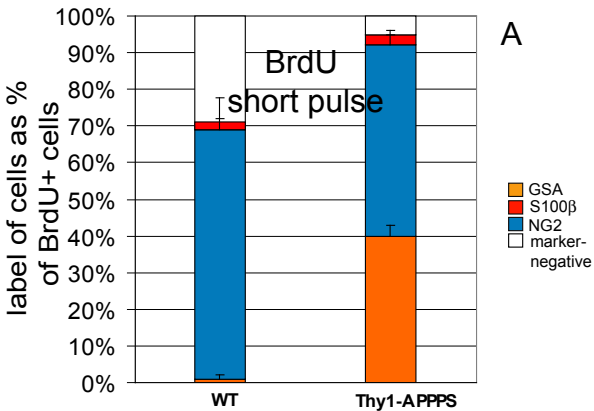

B

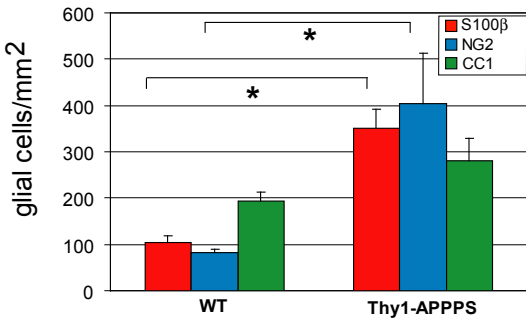

Supplement: pnas_0506535102_2.pdf [file pnas_0506535102_2.pdf]
